# Supplementary material for: Geometrical constraints of thermal dehydration of β-calcium sulfate hemihydrate induced by self-generated water vapor
Source: Royal Society of Chemistry journal article supplement (doi:10.1039/d1cp03824a), 2021-01-01
Supplement: d1cp03824a1.pdf [file d1cp03824a1.pdf]

# Geometrical Constraints of Thermal Dehydration of $\beta$ -Calcium Sulfate Hemihydrate Induced by Self-Generated Water Vapor

Shun Iwasaki, Yuto Zushi, and Nobuyoshi Koga\*

Department of Science Education, Division of Educational Sciences, Graduate School of Humanities and Social Sciences, Hiroshima University, 1-1-1 Kagamiyama, Higashi-Hiroshima 739-8524, Japan

## Contents

|                                                                                                                                                                                                                                                                                                                                                                                                                          |    |
|--------------------------------------------------------------------------------------------------------------------------------------------------------------------------------------------------------------------------------------------------------------------------------------------------------------------------------------------------------------------------------------------------------------------------|----|
| S1. Sample Characterization .....                                                                                                                                                                                                                                                                                                                                                                                        | s2 |
| <b>Figure S1.</b> XRD pattern of the as-received calcium sulfate hemihydrate sample.....                                                                                                                                                                                                                                                                                                                                 | s2 |
| <b>Figure S2.</b> FT-IR spectrum of the as-received calcium sulfate hemihydrate sample.....                                                                                                                                                                                                                                                                                                                              | s2 |
| <b>Figure S3.</b> SEM images of the sample particle: (a) particle shape and (b) particle surface.....                                                                                                                                                                                                                                                                                                                    | s2 |
| <b>Figure S4.</b> EDX spectrum of the calcium sulfate hemihydrate sample. ....                                                                                                                                                                                                                                                                                                                                           | s2 |
| S2. Thermal Behavior .....                                                                                                                                                                                                                                                                                                                                                                                               | s2 |
| <b>Figure S5.</b> Results of the HT-XRD performed in the isothermal heating program mode at 383 K in a flow of dry $N_2$ gas: (a) changes in the XRD pattern with heating time, (b) XRD pattern recorded in the duration of 275–300 min, and (c) changes in the crystallite sizes of the reactant ( $\beta$ - $CaSO_4 \cdot (1/2)H_2O$ ) and product ( $\gamma$ - $CaSO_4$ ) during the thermal dehydration process..... | s2 |
| <b>Figure S6.</b> Influence of the sample mass ( $m_0$ ) on the TG–DTG curves for the thermal dehydration of CS-HH in an open pan, recorded at a $\beta$ of 5 K min <sup>-1</sup> in a flow of dry $N_2$ gas ( $q_v = 80$ cm <sup>3</sup> min <sup>-1</sup> ). ....                                                                                                                                                      | s3 |
| <b>Figure S7.</b> Comparison of TG–DTG curves for the thermal dehydration of CS-HH ( $m_0 =$ approximately 10.0 mg) in open and lidded pans, recorded at a $\beta$ of 5 K min <sup>-1</sup> in a flow of dry $N_2$ gas ( $q_v = 80$ cm <sup>3</sup> min <sup>-1</sup> ). ....                                                                                                                                            | s3 |
| S3. Formal Kinetic Analysis .....                                                                                                                                                                                                                                                                                                                                                                                        | s3 |
| <b>Figure S8.</b> Comparison of the Friedman plots at $\alpha = 0.5$ for the thermal dehydration of CS-HH in open and lidded pans.....                                                                                                                                                                                                                                                                                   | s3 |
| <b>Figure S9.</b> Comparison of the experimental master plots, normalized with reference to the $(d\alpha/d\theta)$ value at $\alpha = 0.5$ , for the thermal dehydration of CS-HH in open and lidded pans. ....                                                                                                                                                                                                         | s3 |
| S4. Physico-Geometrical Kinetic Modeling .....                                                                                                                                                                                                                                                                                                                                                                           | s4 |
| <b>Table S1.</b> Optimized rate constants based on the SR–PBR(1) model for the thermal dehydration of CS–HH in open pan and lidded pans.....                                                                                                                                                                                                                                                                             | s4 |

\* Corresponding author. e-mail: nkoga@hiroshima-u.ac.jp

## S1. Sample Characterization

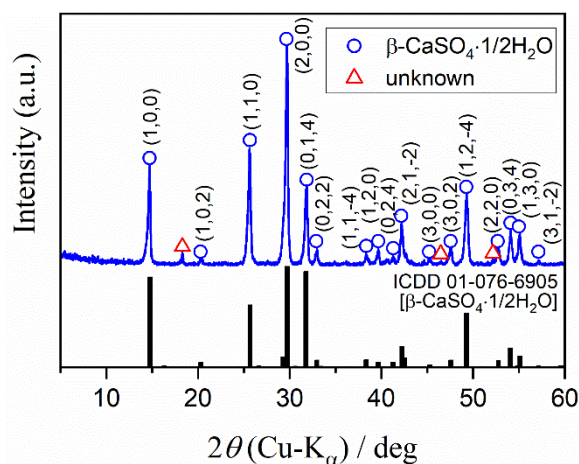

**Figure S1.** XRD pattern of the as-received calcium sulfate hemihydrate sample.

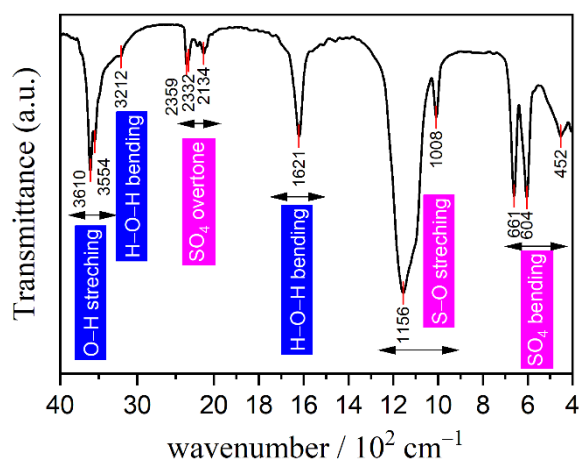

**Figure S2.** FT-IR spectrum of the as-received calcium sulfate hemihydrate sample.

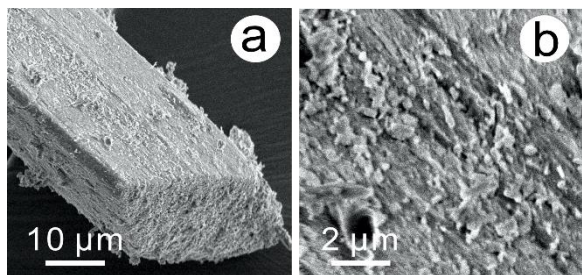

**Figure S3.** SEM images of the sample particle: (a) particle shape and (b) particle surface.

## Supplementary Information

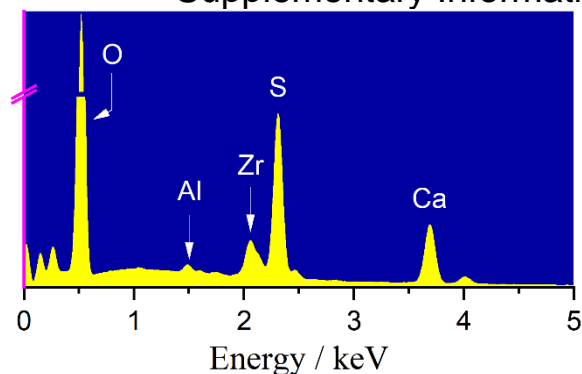

**Figure S4.** EDX spectrum of the calcium sulfate hemihydrate sample.

## S2. Thermal Behavior

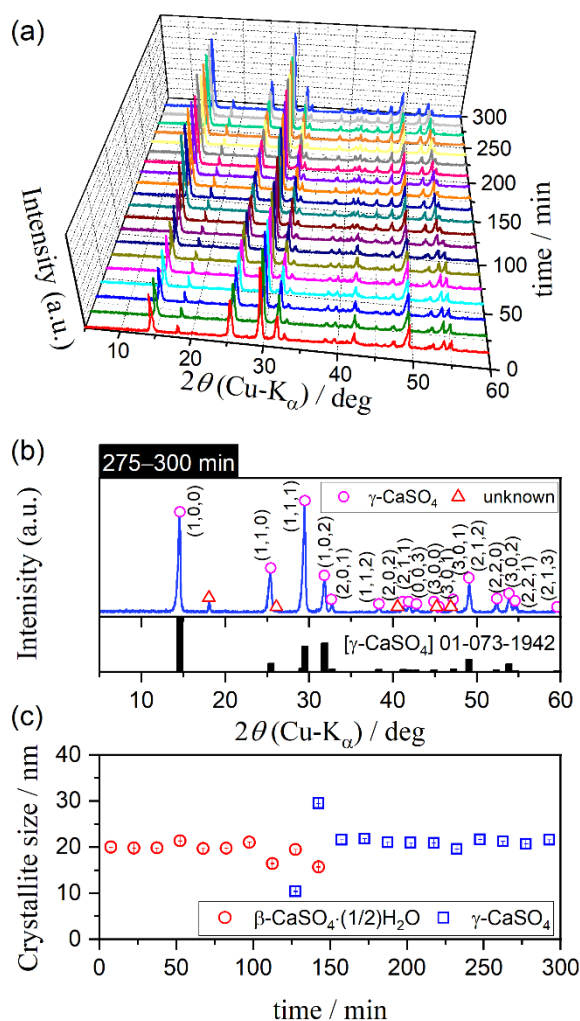

**Figure S5.** Results of the HT-XRD performed in the isothermal heating program mode at 383 K in a flow of dry N<sub>2</sub> gas: (a) changes in the XRD pattern with heating time, (b) XRD pattern recorded in the duration of 275–300 min, and (c) changes in the crystallite sizes of the reactant ( $\beta$ -CaSO<sub>4</sub>·(1/2)H<sub>2</sub>O) and product ( $\gamma$ -CaSO<sub>4</sub>) during the thermal dehydration process.

S3. Formal Kinetic Analysis

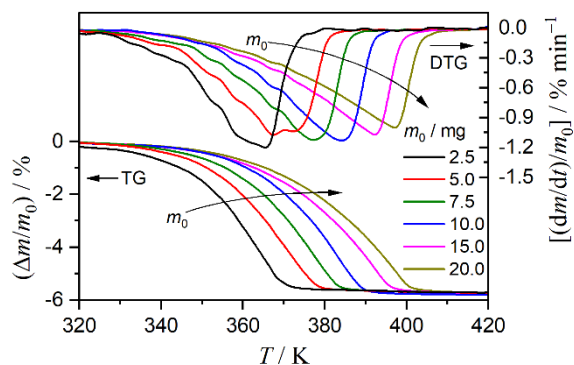

**Figure S6.** Influence of the sample mass ( $m_0$ ) on the TG–DTG curves for the thermal dehydration of CS-HH in an open pan, recorded at a  $\beta$  of 5 K min<sup>-1</sup> in a flow of dry N<sub>2</sub> gas ( $q_v = 80$  cm<sup>3</sup> min<sup>-1</sup>).

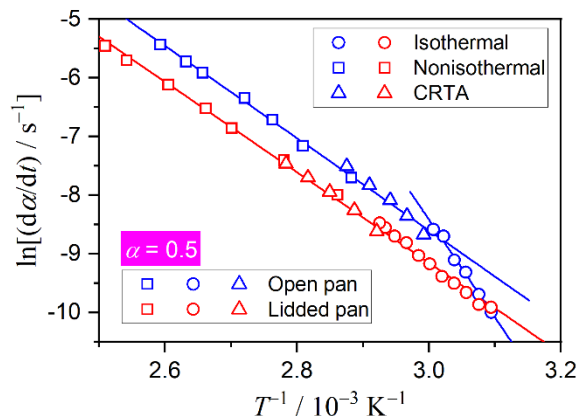

**Figure S8.** Comparison of the Friedman plots at  $\alpha = 0.5$  for the thermal dehydration of CS-HH in open and lidded pans.

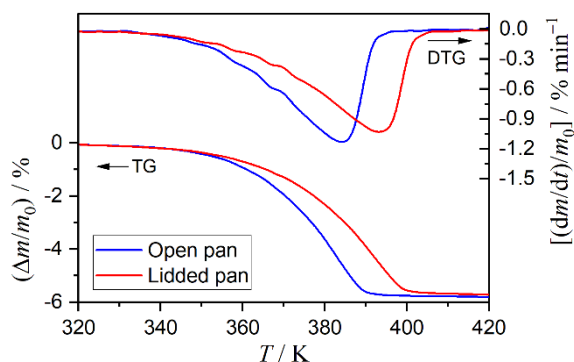

**Figure S7.** Comparison of TG–DTG curves for the thermal dehydration of CS-HH ( $m_0 =$  approximately 10.0 mg) in open and lidded pans, recorded at a  $\beta$  of 5 K min<sup>-1</sup> in a flow of dry N<sub>2</sub> gas ( $q_v = 80$  cm<sup>3</sup> min<sup>-1</sup>).

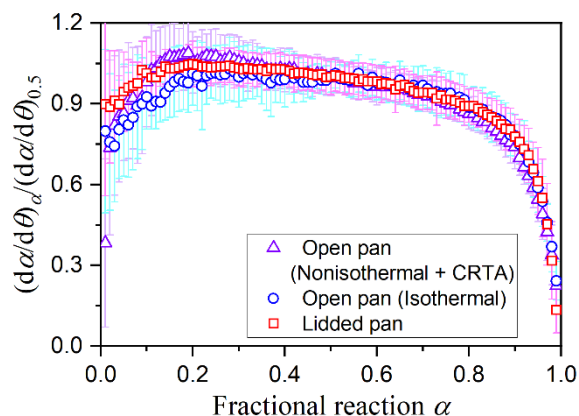

**Figure S9.** Comparison of the experimental master plots, normalized with reference to the  $(d\alpha/d\theta)$  value at  $\alpha = 0.5$ , for the thermal dehydration of CS-HH in open and lidded pans.

## S4. Physico-Geometrical Kinetic Modeling

**Table S1.** Optimized rate constants based on the SR–PBR(1) model for the thermal dehydration of CS–HH in open pan and lidded pans

| Sampling   | $T / \text{K}$ | $k_{\text{SR}} / \text{s}^{-1}$ | $k_{\text{PBR}(1)} / \text{s}^{-1}$ | $R^2, ^a$    |          |
|------------|----------------|---------------------------------|-------------------------------------|--------------|----------|
|            |                |                                 |                                     | differential | Integral |
| Open pan   | 323.1          | $2.865 \times 10^{-4}$          | $4.461 \times 10^{-5}$              | 0.9882       | 0.9977   |
|            | 325.0          | $7.395 \times 10^{-4}$          | $6.099 \times 10^{-5}$              | 0.9849       | 0.9987   |
|            | 327.0          | $1.022 \times 10^{-3}$          | $8.158 \times 10^{-5}$              | 0.9793       | 0.9971   |
|            | 329.0          | $2.294 \times 10^{-3}$          | $1.049 \times 10^{-4}$              | 0.9621       | 0.9984   |
|            | 330.9          | $5.634 \times 10^{-3}$          | $1.568 \times 10^{-4}$              | 0.9628       | 0.9987   |
|            | 333.0          | $9.940 \times 10^{-3}$          | $1.777 \times 10^{-4}$              | 0.9865       | 0.9990   |
| Lidded pan | 323.1          | $9.799 \times 10^{-4}$          | $4.854 \times 10^{-5}$              | 0.9769       | 0.9987   |
|            | 325.1          | $1.066 \times 10^{-3}$          | $5.213 \times 10^{-5}$              | 0.9848       | 0.9989   |
|            | 327.1          | $1.989 \times 10^{-3}$          | $6.105 \times 10^{-5}$              | 0.9795       | 0.9983   |
|            | 329.0          | $2.502 \times 10^{-3}$          | $7.011 \times 10^{-5}$              | 0.9091       | 0.9976   |
|            | 331.0          | $4.258 \times 10^{-3}$          | $8.335 \times 10^{-5}$              | 0.9583       | 0.9956   |
|            | 333.1          | $5.500 \times 10^{-3}$          | $1.002 \times 10^{-4}$              | 0.9878       | 0.9992   |
|            | 335.0          | $5.982 \times 10^{-3}$          | $1.154 \times 10^{-4}$              | 0.9773       | 0.9990   |
|            | 337.0          | $9.936 \times 10^{-3}$          | $1.351 \times 10^{-4}$              | 0.9680       | 0.9992   |
|            | 339.0          | $1.300 \times 10^{-2}$          | $1.564 \times 10^{-4}$              | 0.9835       | 0.9997   |
|            | 340.9          | $1.599 \times 10^{-2}$          | $1.843 \times 10^{-4}$              | 0.9814       | 0.9997   |
|            | 342.8          | $1.797 \times 10^{-2}$          | $2.092 \times 10^{-4}$              | 0.9724       | 0.9995   |

<sup>a</sup>Determination coefficient of the nonlinear least-squares analysis.
